# Supplementary material for: H+ channels in embryonic Biomphalaria glabrata cell membranes: Putative roles in snail host-schistosome interactions
Source: PubMed Central journal article supplement (PMC5373640; doi:10.1371/journal.pntd.0005467), 2017-03-20

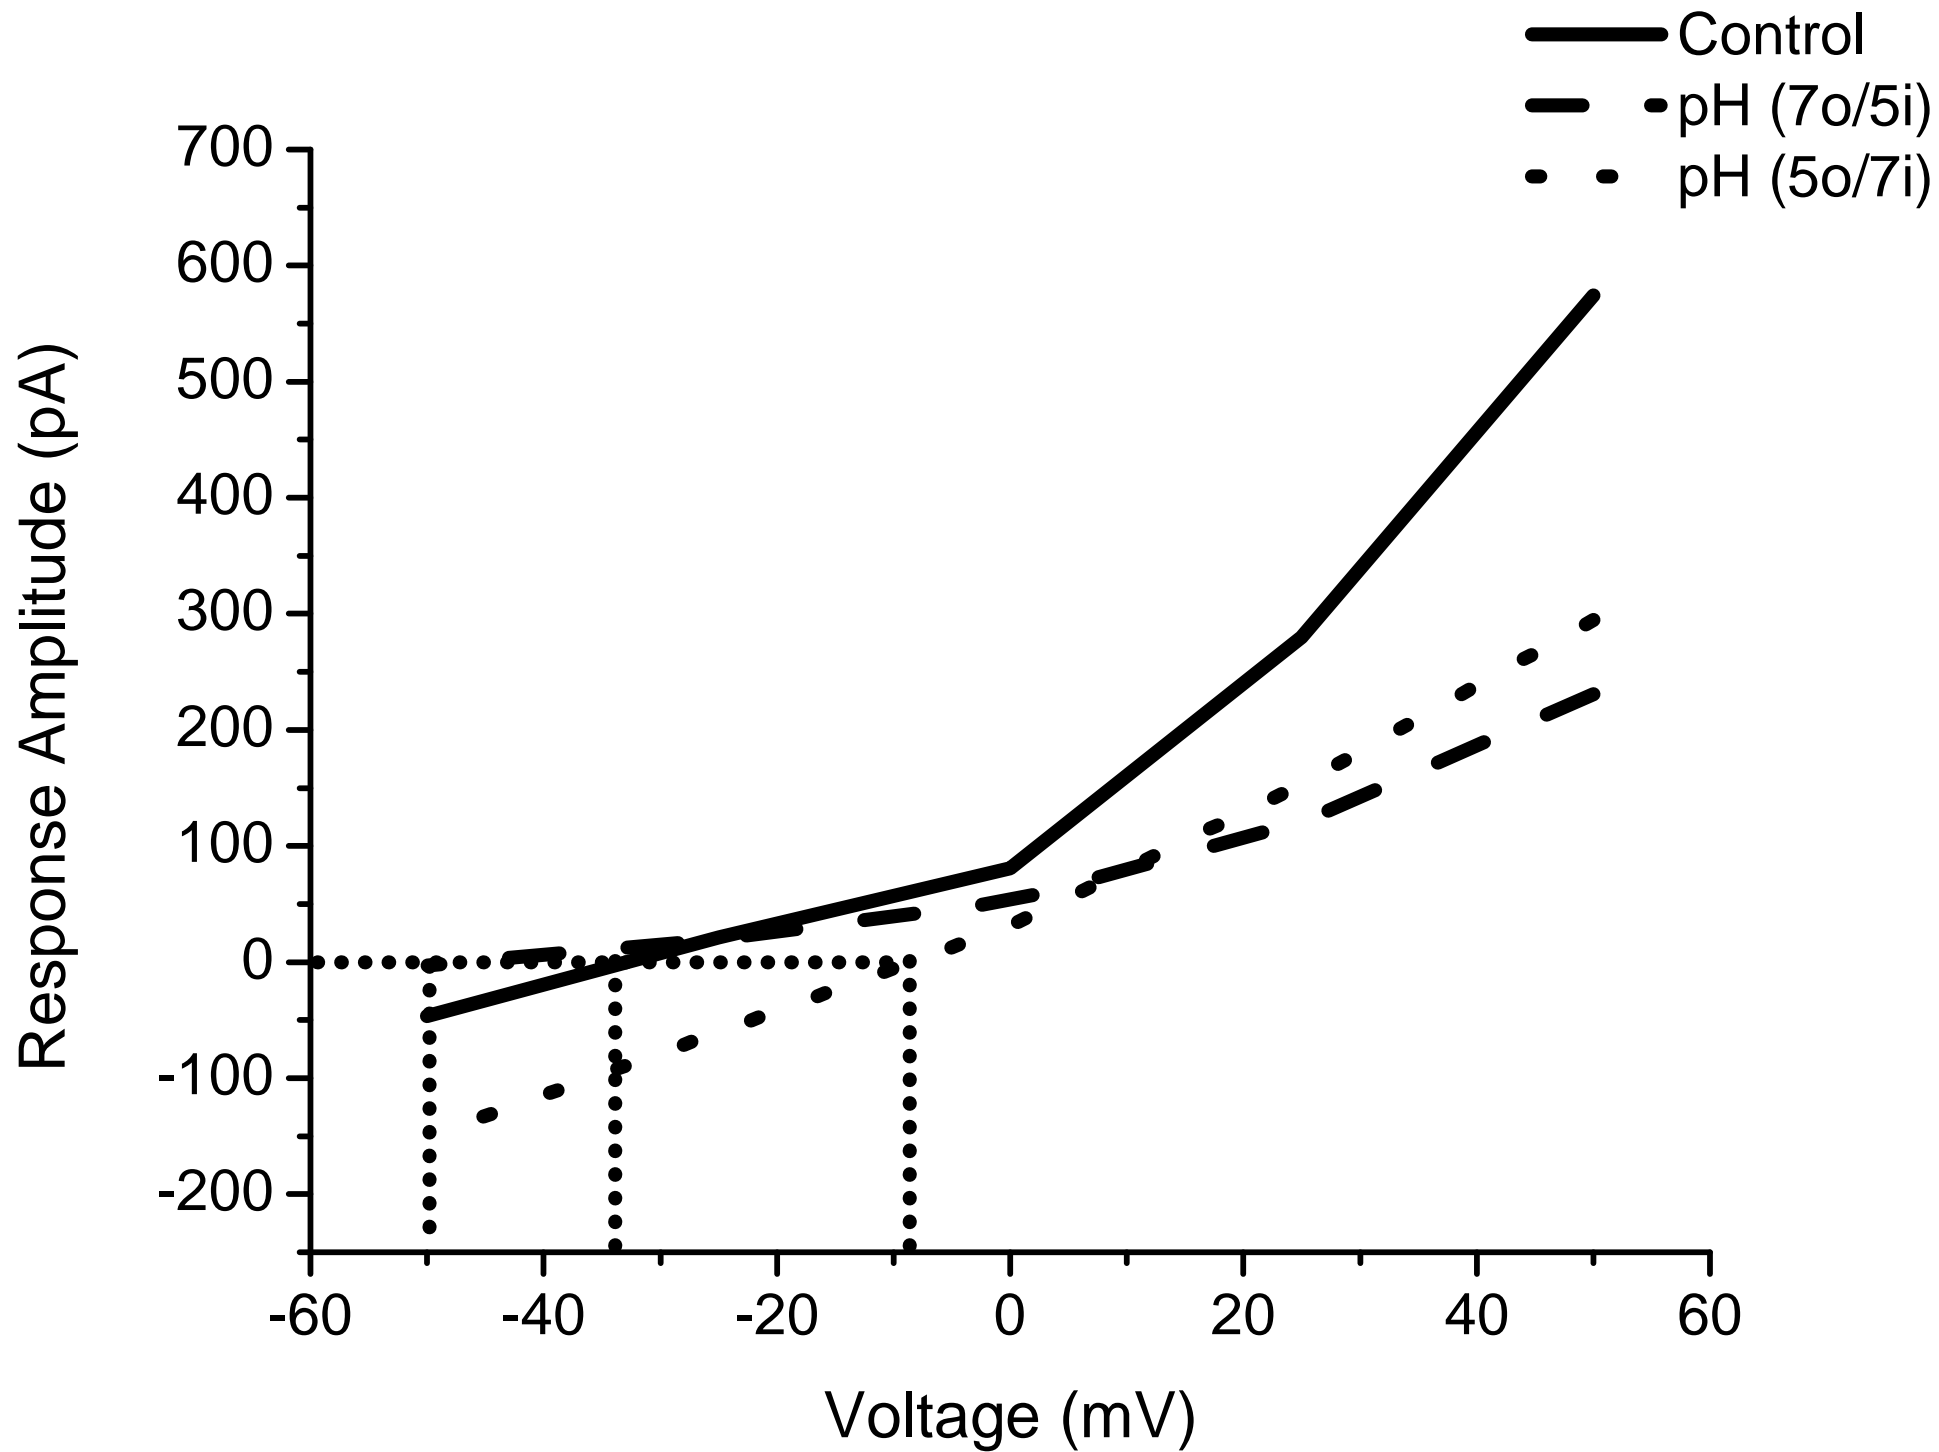

Supplement: pntd.0005467.s002.pdf [file pntd.0005467.s002.pdf]
