# Supplementary material for: H+ channels in embryonic Biomphalaria glabrata cell membranes: Putative roles in snail host-schistosome interactions
Source: PubMed Central journal article supplement (PMC5373640; doi:10.1371/journal.pntd.0005467), 2017-03-20
Supplement: pntd.0005467.s003.pdf [file pntd.0005467.s003.pdf]

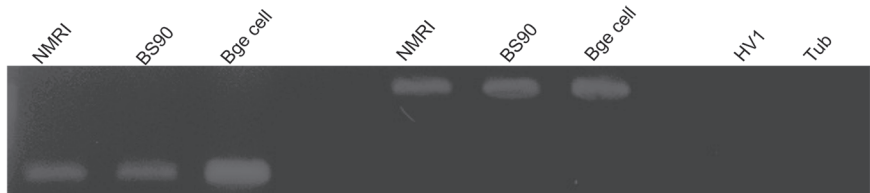

HVCN1-like (HV1)

Alpha-Tubulin(Tub)

(-)ctrl

|                  |     |                    |                                                |                                   |                 |                     |                     |     |
|------------------|-----|--------------------|------------------------------------------------|-----------------------------------|-----------------|---------------------|---------------------|-----|
| PredBGHVCN1-like | 3   | TGCTAT             | GGG                                            | CTTAGCTT                          | ACTTCACACAT     | TTGTTAGAGGTC        | TTTGATGGCACAGTGATTA | 61  |
| Bge Cell         | 2   | TGCTATG            | GGGGCTAGCTT                                    | ACTTCACACAT                       | TTGTTAGAGGTC    | TTTGATGGCACAGTGATTA | 61                  |     |
| NMR1             | 2   | TGCTATG            | GGGGCTAGCTT                                    | ACTTCACACAT                       | TTGTTAGAGGTC    | TTTGATGGCACAGTGATTA | 61                  |     |
| BS90             | 2   | TGCTATG            | GGGGCTAGCTT                                    | ACTTCACACA                        | TTGTTAGAGGTC    | TTTGATGGCACAGTGATTA | 60                  |     |
|                  |     |                    |                                                |                                   |                 |                     |                     |     |
| PredBGHVCN1-like | 62  | TTGTCTCCTTA        | AATACTAGA                                      | CCTTGTCACATT                      | TGCTCAGTCAGGGCT | GGAA                | GTGATGGCAG          | 121 |
| Bge Cell         | 62  | TTGTCTCCTTA        | AATACTAGA                                      | CCTTGTCACATT                      | TGCTCAGTCAGGGCT | GGAA                | GTGATGGCAG          | 121 |
| NMR1             | 62  | TTGTCTCCTTA        | AATACTAGA                                      | CCTTGTCACATT                      | TGCTCAGTCAGGGCT | GGAA                | GTGATGGCAG          | 121 |
| BS90             | 61  | TTGTCTCCTTA        | AATACTAGA                                      | CCCTGTCACATT                      | TGCTCAGTCAGGGCT | GGAA                | GTGATGGCAG          | 120 |
|                  |     |                    |                                                |                                   |                 |                     |                     |     |
| PredBGHVCN1-like | 122 | CTGATATGATC        | ATTTTGT                                        | CAGACTCTGG                        | AGGGTGACACGTTT  | GTTTACAGGGTTCATCT   | 181                 |     |
| Bge Cell         | 122 | CTGATATGATC        | ATTTTGT                                        | CAGACTCTGG                        | AGGGTGACACGTTT  | GTTTACAGGGTTCATCT   | 181                 |     |
| NMR1             | 122 | CTGATATGATC        | ATTTTGT                                        | CAGACTCTGG                        | AGGGTGACACGTTT  | GTTTACAGGGTTCATCT   | 181                 |     |
| BS90             | 121 | CTGATATGATC        | ATTTTGT                                        | CAGACTCTGG                        | AGGGTGACACGTTT  | GTTTACAGGGTTCATCT   | 180                 |     |
|                  |     |                    |                                                |                                   |                 |                     |                     |     |
| PredBGHVCN1-like | 182 | CCTCACTGAAGCGT     | CAGGCTGCAATCAAATCCATGGAGATAGAGGAGAAAAAAAAGGATT | 241                               |                 |                     |                     |     |
| Bge Cell         | 182 | CCTCACTGAAGCGT     | CAGGCTGCAATCAAATCCATGGAGATAGAGGAGAAAAAAAAGGATT | 241                               |                 |                     |                     |     |
| NMR1             | 182 | CCTCACTGAAGCGT     | CAGGCTGCAATCAAATCCATGGAGATAGAGGAGAAAAAAAAGGATT | 241                               |                 |                     |                     |     |
| BS90             | 181 | CCTCACTGAAGCGT     | CAGGCTGCAATCAAATCCATGGAGATAGAGGAGAAAAAAAAGGATT | 240                               |                 |                     |                     |     |
|                  |     |                    |                                                |                                   |                 |                     |                     |     |
| PredBGHVCN1-like | 242 | TAGAGAATCAGATTGAGC | AATCCAATACAAATTTGTAGAAGGC                      | AAAAAGAGAGAATTGACT                | 301             |                     |                     |     |
| Bge Cell         | 242 | TAGAGAATCAGATTGAGC | AATCCAATACAAATTTGTAGAAGGC                      | AAAAAGAGAGAATTGACT                | 301             |                     |                     |     |
| NMR1             | 242 | TAGAGAATCAGATTGAGC | AATCCAATACAAATTTGTAGAAGGC                      | AAAAAGAGAGAATTGACT                | 301             |                     |                     |     |
| BS90             | 241 | TAGAGAATCAGATTGAGC | AATCCAATACAAATTTGTAGAAGGC                      | AAAAAGAGAGAATTGACT                | 300             |                     |                     |     |
|                  |     |                    |                                                |                                   |                 |                     |                     |     |
| PredBGHVCN1-like | 302 | ATCTGACAAATC       | TTTTTAAA                                       | AGATAACCATATTGCTTTTCAAGAATGGTTTGA | GACCC           | T                   | 360                 |     |
| Bge Cell         | 302 | ATCTGACAAATC       | TTTTTAAA                                       | AGATAACCATATTGCTTTTCAAGAATGGTTTGA | GACCC           | C                   | 360                 |     |
| NMR1             | 302 | ATCTGACAAATC       | TTTTTAAA                                       | AGATAACCATATTGCTTTTCAAGAATGGTTTGA | GACCC           | T                   | 359                 |     |
| BS90             | 301 | ATCTGACAAATC       | TTTTTAAA                                       | AGATAACCATATTGCTTTTCAAGAATGGTTTGA | GACCC           | T                   | 358                 |     |
|                  |     |                    |                                                |                                   |                 |                     |                     |     |
| PredBGHVCN1-like | 361 | ACAT               | 364                                            |                                   |                 |                     |                     |     |
| Bge Cell         | 361 | ACAT               | 364                                            |                                   |                 |                     |                     |     |
| NMR1             | 360 | ACAT               | 363                                            |                                   |                 |                     |                     |     |
| BS90             | 359 | ACAT               | 362                                            |                                   |                 |                     |                     |     |
